# Supplementary material
Source: PubMed Central journal article supplement (PMC164487)
Supplement: pnas_0732024100_2.pdf [file pnas_0732024100_2.pdf]

9907 AE003048 *Transib1* 11645  
cgagagagcggagagcgcta**CAGCCACACTGGTTTTTTATGTGT . . ACACATAAAAAACCACAGTG**CAGCGaacagctcttttctac  
\*\*\*\*\*  
cgagagagcggagagcgcta-----CAGCGaacagctcttttctac  
112 *PROTOP\_B* 152

55907 AC006215 *Transib2* 56302  
actttaatttctcatattaa**CATTGC**ACTGTGGTCCAGAATTCTT . . TCGAATTCTGGACCACAGTG**CATTG**gcgggtcttctctcaa  
\*\*\*\*\*  
actttaatttctcataataa-----CATTGgcggtgtcttctctcac  
2204 *INVADER4\_I* 2164

129354 AC011757 *Transib3* 127931  
tatacaccactacacaaaca**CACTGC**CACACTGGGCCAGATTCCCT . . AGGGAATCTCCCCAGTGTG**CACTG**tggtgagttttaccgg  
\*\*\*\*\*  
catacaccactacacagaca-----CACTGtggtgagttttaccgg  
204 *INVADER5\_LTR* 164

29806 AE003410 *Hopper* 31285  
tacttctggatgcggttgccc**CACAG**CACTATGGGGCATTGGCCT . . AGGCCAAATGCCCCATAGTG**CACAG**ctcggagccataagtc  
\*\*\*\*\*  
tacttctggatgcggttgccc-----CACAGctcggagccataagtc  
4331 *Doc* 4291

*Transib1 AG*  
5'-**CACAGTGGTACTNNNNNNN . . NNNNNNNACTACCCTGTG**-3'
