# Supplementary material
Source: PubMed Central journal article supplement (PMC164487)
Supplement: pnas_0732024100_3.pdf [file pnas_0732024100_3.pdf]

**Table 4. Cross-similarities of the *Transib1–4* consensus sequences and proteins encoded by them**

| Family          | <i>Transib1</i>                 | <i>Transib2</i>                 | <i>Transib3</i>                 | <i>Transib4</i>                 |
|-----------------|---------------------------------|---------------------------------|---------------------------------|---------------------------------|
| <i>Transib1</i> | <b>461 aa</b><br><b>2167 bp</b> | 64 (2-446)<br>62 (21-2167)      | 59 (1-443)<br>60 (21-2147)      | 57 (3-357)<br>62 (103-2109)     |
| <i>Transib2</i> | 46 (2-460)<br>62 (20-2844)      | <b>690 aa</b><br><b>2844 bp</b> | 62 (2-688)<br>62 (1-2844)       | 50 (1-649)<br>61 (1-2844)       |
| <i>Transib3</i> | 41 (1-452)<br>60 (20-2864)      | 43 (2-688)<br>62 (1-2883)       | <b>685 aa</b><br><b>2883 bp</b> | 48 (3-649)<br>60 (1-2883)       |
| <i>Transib4</i> | 43 (3-367)<br>62 (100-1893)     | 34 (1-536)<br>61 (1-2656)       | 32 (3-535)<br>60 (1-2656)       | <b>533 aa</b><br><b>2656 bp</b> |

Lengths of transposases and transposons are shown in diagonal cells. Each under-diagonal cell *ij* shows an identity between the *i* and *j* transposases (the first line) and nucleotide identity between the *i* and *j* transposons (the second line). Numbers in parentheses are positions of the matching regions in the *i* transposase and transposon. Each above-diagonal cell *ji* shows a similarity between the *j* and *i* transposases (the first line) and nucleotide identity between the *j* and *i* transposons (the second line). Numbers in parentheses are positions of the matching regions in the *j* transposase and transposon.
